# Supplementary material
Source: publisher figshare collection journal article supplement (https://frontiersin.figshare.com/ndownloader/files/14158643)
Supplement: Supplementary file [file 14158643]

## Supporting Information

### 1. Equations for describing equilibrium performances.

The pseudo first-order equation can be expressed as linear and non-linear forms by equations (3) and (4), respectively (Yu et al., 2015c):

$$\ln(Q_e - Q_t) = \ln Q_e - k_1 t \quad (3)$$

$$Q_t = Q_e - Q_e e^{(-k_1 t)} \quad (4)$$

The pseudo second-order equation can be expressed as linear and non-linear forms by equations (5) and (6), respectively (Yu et al., 2015b):

$$\frac{t}{Q_t} = \frac{1}{k_2 Q_e^2} + \frac{t}{Q_e} \quad (5)$$

$$Q_t = \frac{k_2 Q_e^2 t}{1 + k_2 Q_e t} \quad (6)$$

Where  $Q_t$  (mg g<sup>-1</sup>) is the amount adsorbed at various time  $t$ , while  $Q_e$  (mg g<sup>-1</sup>) is the amount adsorbed at equilibrium time.  $k_1$  (min<sup>-1</sup>) is the equilibrium rate constant of the pseudo-first-order model, the value of  $k_1$  can be obtained by plotting  $\ln(Q_e - Q_t)$  versus  $t$ .  $k_2$  (g mg<sup>-1</sup> min<sup>-1</sup>) is the pseudo-second-order model rate constant calculated from the plot of  $t/Q_t$  versus  $t$ .

Based on the pseudo second-order kinetic model, the initial adsorption rate ( $h$ , mg g<sup>-1</sup> min<sup>-1</sup>), and half-adsorption time ( $t_{1/2}$ , min) were calculated according to the following equations (7) and (8) (Yu et al., 2015b):

$$h = k_2 Q_e^2 \quad (7)$$

$$t_{1/2} = \frac{1}{k_2 Q_e} \quad (8)$$

The linear and non-linear forms of the Langmuir isotherm models are expressed by the following equations (9) and (10), respectively (Yu et al., 2015c):

$$\frac{C_e}{Q_e} = \frac{1}{Q_m K_L} + \frac{C_e}{Q_m} \quad (9)$$

$$Q_e = \frac{K_L Q_m C_e}{1 + K_L C_e} \quad (10)$$

Where  $C_e$  is the equilibrium concentration of adsorbate (mg L<sup>-1</sup>),  $Q_e$  is the equilibrium adsorption capacity (mg g<sup>-1</sup>),  $Q_m$  (mg g<sup>-1</sup>) is the maximum adsorption capacity,  $K_L$  (L

$\text{mg}^{-1}$ ) represents the Langmuir adsorption constant.

For predicting the favorability of an adsorption system, the Langmuir equation can also be expressed in terms of a dimensionless separation factor  $R_L$  (Yu et al., 2015b).

$$R_L = \frac{1}{1 + C_m K_L} \quad (11)$$

Where  $C_m$  ( $\text{mg L}^{-1}$ ) is the maximal initial concentration of solutions. The value of  $R_L$  indicates whether the type of the isotherm is favorable ( $0 < R_L < 1$ ), unfavorable ( $R_L > 1$ ), linear ( $R_L = 1$ ), or irreversible ( $R_L = 0$ ).

The linear and non-linear forms of the Freundlich isotherm models are expressed by the following equations (12) and (13), respectively (Yu et al., 2015b) :

$$\ln Q_e = \ln K_F + \frac{1}{n} \ln C_e \quad (12)$$

$$Q_e = K_F C_e^{1/n} \quad (13)$$

Where  $K_F$  ( $(\text{mg g}^{-1})(\text{mg}^{-1})^{1/n}$ ) is the Freundlich adsorption constant and  $1/n$  is the heterogeneity factor measuring the adsorption intensity or surface heterogeneity. The value of  $1/n$  ranging from 0.0 to 1.0 represents a normal Langmuir adsorption condition; otherwise, it was indicative of cooperative adsorption (Li et al., 2012b).

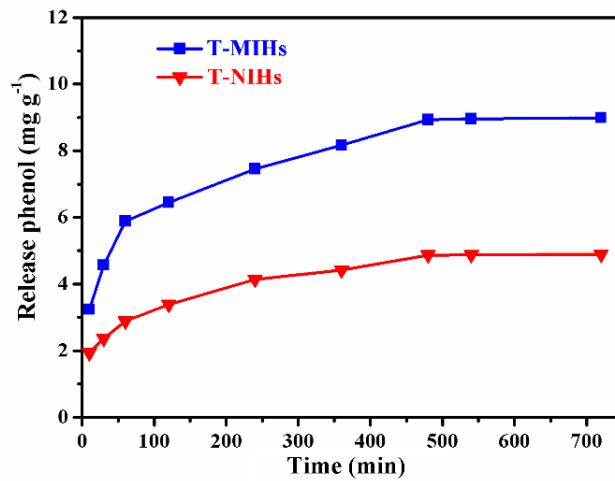

Fig. S1 Release kinetics of T-MIHs and T-NIHs at 45 °C.

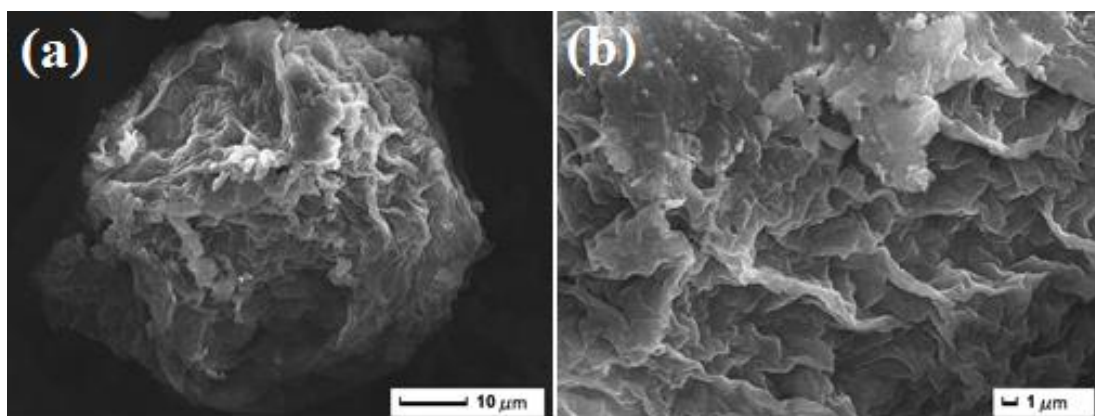

Fig. S2 SEM images of T-NIHs.

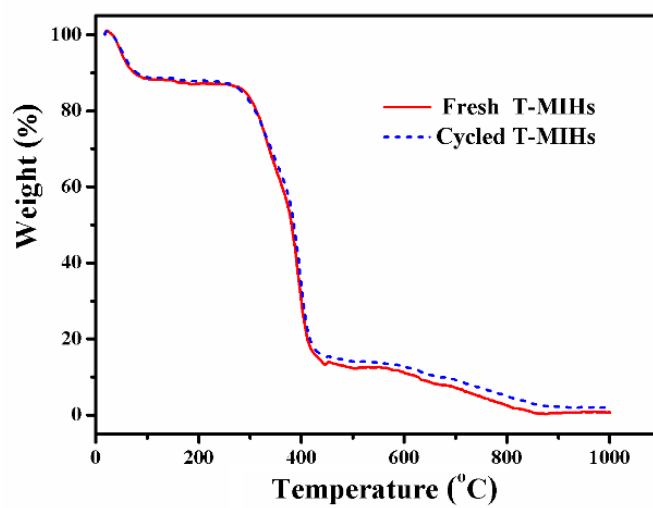

Fig. S3 The TGA curves of fresh T-MIHs and cycled T-MIHs
